# Supplementary material for: Interaction between residential greenness and air pollution mortality: analysis of the Chinese Longitudinal Healthy Longevity Survey
Source: PubMed Central journal article supplement — Lancet Planet Health. 2020 Mar 25;4(3):e107–15. doi: 10.1016/S2542-5196(20)30027-9 (PMC7232951; doi:10.1016/s2542-5196(20)30027-9), 2020-03-25

# THE LANCET Planetary Health

## Supplementary appendix

This appendix formed part of the original submission and has been peer reviewed.  
We post it as supplied by the authors.

Supplement to: Ji J S, Zhu A, Lv Y, et al. Interaction between residential greenness and air pollution mortality: analysis of the Chinese Longitudinal Healthy Longevity Survey. *Lancet Planet Health* 2020; **4**: e107–115.

**Supplementary Table 1. Hazard ratios and 95% confidence intervals for each 0.1-unit decrease in contemporaneous NDVI, each 10  $\mu\text{g}/\text{m}^3$  increase in 3-year average  $\text{PM}_{2.5}$ , and mortality (adjusted for more informative covariates)**

|                                  | HR (95% CI)       |
|----------------------------------|-------------------|
| Model 1                          |                   |
| Contemporaneous NDVI             | 1.13 (1.12, 1.14) |
| Model 2                          |                   |
| 3-year average $\text{PM}_{2.5}$ | 1.09 (1.07, 1.12) |
| Model 3                          |                   |
| Contemporaneous NDVI             | 1.13 (1.12, 1.14) |
| 3-year average $\text{PM}_{2.5}$ | 1.09 (1.07, 1.12) |
| Model 3                          |                   |
| Contemporaneous NDVI             | 1.07 (1.13, 1.12) |
| 3-year average $\text{PM}_{2.5}$ | 1.14 (1.09, 1.18) |
| Interaction                      | 1.01 (1.00, 1.02) |
| p-value for interaction          | 0.015             |

Note: All models were adjusted for a number of covariates, including age, sex, ethnicity, marital status, urban/rural residence, education, main occupation before age 60, financial support, social and leisure activity, geographical region, smoking status (never/former/current smokers), alcohol consumption (never/former/current smokers), and physical activity at baseline. p-value indicated the significance test for the interaction between each 0.1-unit decrease in contemporaneous NDVI and each 10  $\mu\text{g}/\text{m}^3$  increase in 3-year average  $\text{PM}_{2.5}$  in Model 4.

Model 1 tested the main effect of each 0.1-unit decrease in contemporaneous NDVI on mortality.

Model 2 tested the main effect of each 10  $\mu\text{g}/\text{m}^3$  increase in 3-year average  $\text{PM}_{2.5}$  on mortality.

Model 3 tested the main effects of each 0.1-unit decrease in contemporaneous NDVI and each 10  $\mu\text{g}/\text{m}^3$  increase in 3-year average  $\text{PM}_{2.5}$  on mortality.

Model 4 tested the interaction between each 0.1-unit decrease in contemporaneous NDVI and each 10  $\mu\text{g}/\text{m}^3$  increase in 3-year average  $\text{PM}_{2.5}$  on mortality.

**Supplementary Table 2. A comparison summary of the baseline characteristics between the included participants (n=12,873) and all participants (n=16,954) of 2008 wave**

| Characteristics               | Included participants | All participants | p-value |
|-------------------------------|-----------------------|------------------|---------|
|                               | 12,873                | 16,954           | ..      |
| Age (years) (mean±SD)         | 87±11·34              | 87±11·97         | 0·24    |
| Sex                           |                       |                  |         |
| Males                         | 5,488 (42·63)         | 7,252 (42·77)    | 0·81    |
| Females                       | 7,385 (57·37)         | 9,702 (57·23)    |         |
| Ethnicity                     |                       |                  |         |
| Han Chinese                   | 12,015 (93·33)        | 15,918 (93·89)   | 0·052   |
| Ethnic minorities             | 858 (6·67)            | 1,036 (6·11)     |         |
| Marital status                |                       |                  |         |
| Married                       | 3,987 (30·97)         | 5,251 (30·97)    | 1·00    |
| Not married                   | 8,886 (69·03)         | 11,703 (69·03)   |         |
| Residence                     |                       |                  |         |
| Urban area                    | 1,980 (15·38)         | 3,351 (19·77)    | <0·001  |
| Rural area                    | 10,893 (84·62)        | 13,603 (80·23)   |         |
| Main occupation before age 60 |                       |                  |         |
| Professional work             | 820 (6·37)            | 1,183 (6·98)     | 0·038   |
| Non-professional work         | 12,053 (93·63)        | 15,771 (93·02)   |         |
| Education                     |                       |                  |         |
| Formal education              | 4,664 (36·23)         | 6,371 (37·58)    | 0·017   |
| No formal education           | 8,209 (63·77)         | 10,583 (62·42)   |         |
| Financial support             |                       |                  |         |
| Financial independence        | 3,022 (23·48)         | 4,395 (25·92)    | <0·001  |
| Financial dependence          | 9,851 (76·52)         | 12,559 (74·08)   |         |

|                                             |                |                |       |
|---------------------------------------------|----------------|----------------|-------|
| Social and leisure activity index (mean±SD) | 2·03±1·53      | 2·06±1·56      | 0·12  |
| Smoking status                              |                |                |       |
| Yes                                         | 2,309 (17·94)  | 13,988 (82·51) | 0·32  |
| No                                          | 10,564 (82·06) | 2,966 (17·49)  |       |
| Alcohol consumption                         |                |                |       |
| Yes                                         | 2,307 (17·92)  | 14,021 (82·70) | 0·16  |
| No                                          | 10,566 (82·08) | 2,933 (17·30)  |       |
| Physical activity                           |                |                |       |
| Yes                                         | 3,425 (26·61)  | 12,309 (72·60) | 0·13  |
| No                                          | 9,448 (73·39)  | 4,645 (27·40)  |       |
| Geographic regions                          |                |                |       |
| Central China                               | 2,192 (17·03)  | 2,831 (16·70)  |       |
| Eastern China                               | 4,896 (38·03)  | 6,424 (37·89)  |       |
| Northeastern China                          | 858 (6·67)     | 1,257 (7·41)   | 0·043 |
| Northern China                              | 515 (4·00)     | 738 (4·35)     |       |
| Northwestern China                          | 111 (0·86)     | 169 (1·00)     |       |
| Southern China                              | 2,569 (19·96)  | 3,381 (19·94)  |       |
| Southwestern China                          | 1,732 (13·45)  | 2,154 (12·70)  |       |

---

**Supplementary Table 3. Hazard ratios and 95% confidence intervals for each 0.1-unit decrease in cumulative NDVI, each 10 µg/m<sup>3</sup> increase in 3-year average PM<sub>2.5</sub>, and mortality**

|                                  | HR (95% CI)       |
|----------------------------------|-------------------|
| Model 1                          |                   |
| cumulative NDVI                  | 0.97 (0.95, 0.99) |
| Model 2                          |                   |
| 3-year average PM <sub>2.5</sub> | 1.10 (1.04, 1.16) |
| Model 3                          |                   |
| cumulative NDVI                  | 0.97 (0.95, 0.99) |
| 3-year average PM <sub>2.5</sub> | 1.10 (1.07, 1.12) |
| Model 3                          |                   |
| cumulative NDVI                  | 0.91 (0.85, 0.97) |
| 3-year average PM <sub>2.5</sub> | 1.16 (1.09, 1.23) |
| Interaction                      | 1.01 (1.00, 1.03) |
| p-value for interaction          | 0.042             |

Note: All models were adjusted for a number of covariates, including age, sex, ethnicity, marital status, urban/rural residence, education, main occupation before age 60, financial support, social and leisure activity, geographical region, smoking status, alcohol consumption, and physical activity at baseline. p-value indicated the significance test for the interaction between each 0.1-unit decrease in cumulative NDVI and each 10 µg/m<sup>3</sup> increase in 3-year average PM<sub>2.5</sub> in Model 4.

Model 1 tested the main effect of each 0.1-unit decrease in cumulative NDVI on mortality.

Model 2 tested the main effect of each 10 µg/m<sup>3</sup> increase in 3-year average PM<sub>2.5</sub> on mortality.

Model 3 tested the main effects of each 0.1-unit decrease in cumulative NDVI and each 10 µg/m<sup>3</sup> increase in 3-year average PM<sub>2.5</sub> on mortality.

Model 4 tested the interaction between each 0.1-unit decrease in contemporaneous NDVI and each 10 µg/m<sup>3</sup> increase in 3-year average PM<sub>2.5</sub> on mortality.

**Supplementary Table 4. Hazard ratios and 95% confidence intervals for each 0.1-unit decrease in contemporaneous NDVI, each 10  $\mu\text{g}/\text{m}^3$  increase in 3-year average  $\text{PM}_{2.5}$ , and mortality (weighted analysis)**

|                                  | HR (95% CI)       |
|----------------------------------|-------------------|
| Model 1                          |                   |
| Contemporaneous NDVI             | 1.23 (1.20, 1.27) |
| Model 2                          |                   |
| 3-year average $\text{PM}_{2.5}$ | 1.10 (1.04, 1.16) |
| Model 3                          |                   |
| Contemporaneous NDVI             | 1.23 (1.20, 1.27) |
| 3-year average $\text{PM}_{2.5}$ | 1.10 (1.04, 1.16) |
| Model 4                          |                   |
| Contemporaneous NDVI             | 1.10 (0.99, 1.23) |
| 3-year average $\text{PM}_{2.5}$ | 1.20 (1.09, 1.32) |
| Interaction                      | 1.02 (1.00, 1.05) |
| p-value for interaction          | 0.031             |

Note: All models were adjusted for a number of covariates, including age, sex, ethnicity, marital status, urban/rural residence, education, main occupation before age 60, financial support, social and leisure activity, geographical region, smoking status (never/former/current smokers), alcohol consumption (never/former/current smokers), and physical activity at baseline. p-value indicated the significance test for the interaction between each 0.1-unit decrease in contemporaneous NDVI and each 10  $\mu\text{g}/\text{m}^3$  increase in 3-year average  $\text{PM}_{2.5}$  in Model 4.

Model 1 tested the main effect of each 0.1-unit decrease in contemporaneous NDVI on mortality.

Model 2 tested the main effect of each 10  $\mu\text{g}/\text{m}^3$  increase in 3-year average  $\text{PM}_{2.5}$  on mortality.

Model 3 tested the main effects of each 0.1-unit decrease in contemporaneous NDVI and each 10  $\mu\text{g}/\text{m}^3$  increase in 3-year average  $\text{PM}_{2.5}$  on mortality.

Model 4 tested the interaction between each 0.1-unit decrease in contemporaneous NDVI and each 10  $\mu\text{g}/\text{m}^3$  increase in 3-year average  $\text{PM}_{2.5}$  on mortality.

**Supplementary Table 5. Hazard ratios and 95% confidence intervals for each 0.1-unit decrease in contemporaneous NDVI, each 10 µg/m<sup>3</sup> increase in 3-year average PM<sub>2.5</sub>, and mortality (excluding the participants with negative NDVI values, n=12,803)**

|                                  | HR (95% CI)       |
|----------------------------------|-------------------|
| Model 1                          |                   |
| Contemporaneous NDVI             | 1.13 (1.12, 1.14) |
| Model 2                          |                   |
| 3-year average PM <sub>2.5</sub> | 1.09 (1.07, 1.12) |
| Model 3                          |                   |
| Contemporaneous NDVI             | 1.13 (1.12, 1.14) |
| 3-year average PM <sub>2.5</sub> | 1.09 (1.07, 1.12) |
| Model 4                          |                   |
| Contemporaneous NDVI             | 1.08 (1.03, 1.13) |
| 3-year average PM <sub>2.5</sub> | 1.13 (1.09, 1.18) |
| Interaction                      | 1.01 (1.00, 1.02) |
| p-value for interaction          | 0.028             |

Note: All models were adjusted for a number of covariates, including age, sex, ethnicity, marital status, urban/rural residence, education, main occupation before age 60, financial support, social and leisure activity, geographical region, smoking status (never/former/current smokers), alcohol consumption (never/former/current smokers), and physical activity at baseline. p-value indicated the significance test for the interaction between each 0.1-unit decrease in contemporaneous NDVI and each 10 µg/m<sup>3</sup> increase in 3-year average PM<sub>2.5</sub> in Model 4.

Model 1 tested the main effect of each 0.1-unit decrease in contemporaneous NDVI on mortality.

Model 2 tested the main effect of each 10 µg/m<sup>3</sup> increase in 3-year average PM<sub>2.5</sub> on mortality.

Model 3 tested the main effects of each 0.1-unit decrease in contemporaneous NDVI and each 10 µg/m<sup>3</sup> increase in 3-year average PM<sub>2.5</sub> on mortality.

Model 4 tested the interaction between each 0.1-unit decrease in contemporaneous NDVI and each 10 µg/m<sup>3</sup> increase in 3-year average PM<sub>2.5</sub> on mortality.

**Supplementary Table 6. Hazard ratios and 95% confidence intervals for each 0.1-unit decrease in contemporaneous NDVI, each 10  $\mu\text{g}/\text{m}^3$  increase in 3-year average  $\text{PM}_{2.5}$ , and mortality (excluding the participants with missing covariates, n=12,837)**

|                                  | HR (95% CI)       |
|----------------------------------|-------------------|
| Model 1                          |                   |
| Contemporaneous NDVI             | 1.13 (1.12, 1.15) |
| Model 2                          |                   |
| 3-year average $\text{PM}_{2.5}$ | 1.09 (1.07, 1.12) |
| Model 3                          |                   |
| Contemporaneous NDVI             | 1.13 (1.12, 1.14) |
| 3-year average $\text{PM}_{2.5}$ | 1.09 (1.07, 1.12) |
| Model 3                          |                   |
| Contemporaneous NDVI             | 1.08 (1.03, 1.13) |
| 3-year average $\text{PM}_{2.5}$ | 1.13 (1.09, 1.18) |
| Interaction                      | 1.01 (1.00, 1.02) |
| p-value for interaction          | 0.030             |

Note: All models were adjusted for a number of covariates, including age, sex, ethnicity, marital status, urban/rural residence, education, main occupation before age 60, financial support, social and leisure activity, geographical region, smoking status (never/former/current smokers), alcohol consumption (never/former/current smokers), and physical activity at baseline. p-value indicated the significance test for the interaction between each 0.1-unit decrease in contemporaneous NDVI and each 10  $\mu\text{g}/\text{m}^3$  increase in 3-year average  $\text{PM}_{2.5}$  in Model 4.

Model 1 tested the main effect of each 0.1-unit decrease in contemporaneous NDVI on mortality.

Model 2 tested the main effect of each 10  $\mu\text{g}/\text{m}^3$  increase in 3-year average  $\text{PM}_{2.5}$  on mortality.

Model 3 tested the main effects of each 0.1-unit decrease in contemporaneous NDVI and each 10  $\mu\text{g}/\text{m}^3$  increase in 3-year average  $\text{PM}_{2.5}$  on mortality.

Model 4 tested the interaction between each 0.1-unit decrease in contemporaneous NDVI and each 10  $\mu\text{g}/\text{m}^3$  increase in 3-year average  $\text{PM}_{2.5}$  on mortality.



Supplementary Figure 1. Geographic distribution of the number of included participants by provinces

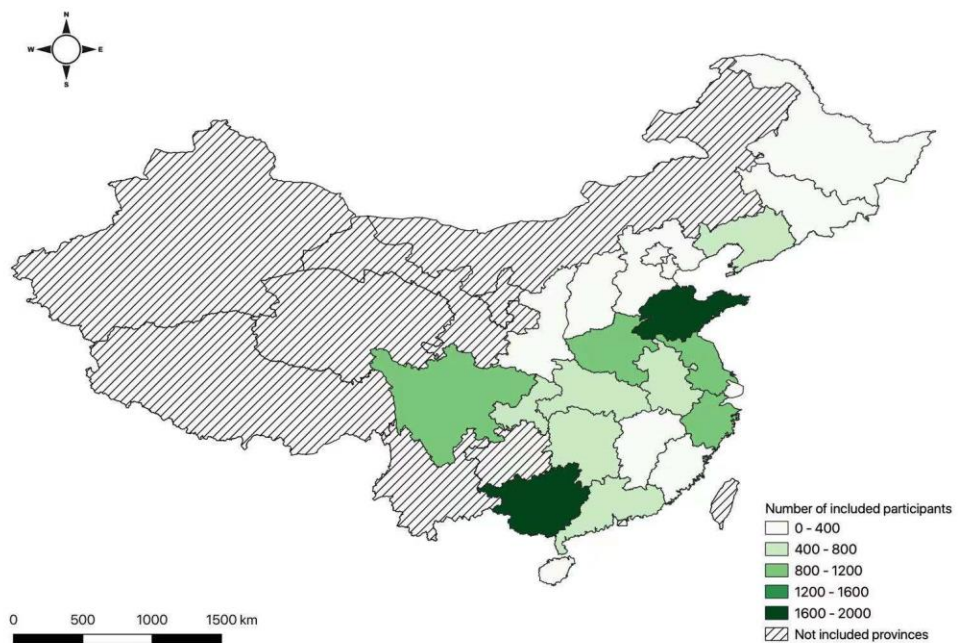

Supplement: mmc1.pdf [file mmc1.pdf]
